# Supplementary material
Source: publisher figshare collection journal article supplement (https://karger.figshare.com/ndownloader/files/18057389)

# Dimethylarginine Dimethyl Aminohydrolase-1 polymorphisms and venous intimal hyperplasia in dialysis patients

**Supplemental Figure 1** Linkage disequilibrium map of the DDAH1 region. The plot was constructed using genotype data of this cohort and Haploview 4.2.

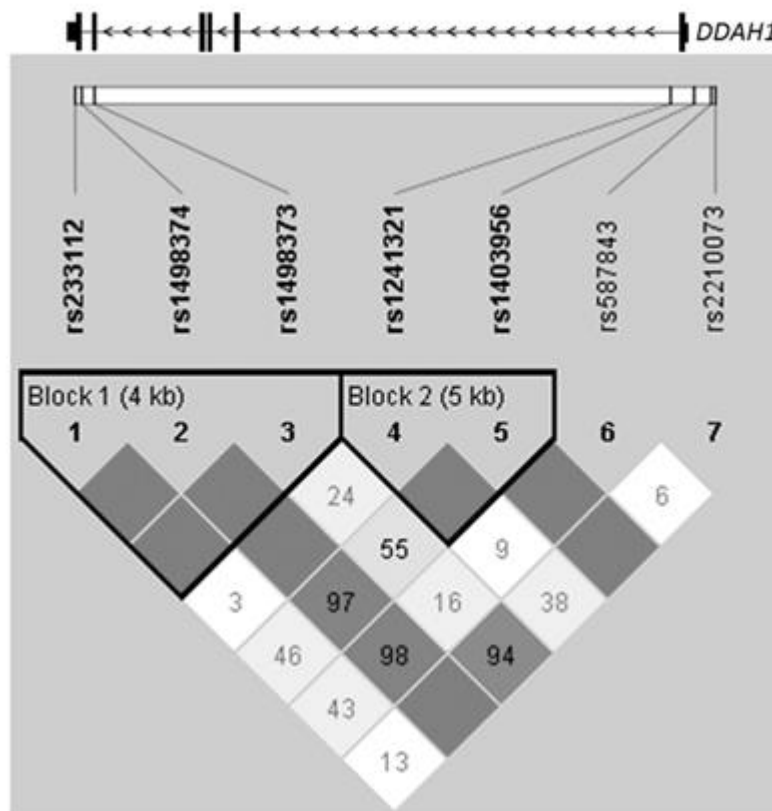

Supplement: Supplementary file 1 [file 18057389]
